# Supplementary material for: An engineered self-supported electrocatalytic cathode and dendrite-free composite anode based on 3D double-carbon hosts for advanced Li–SeS2 batteries
Source: Royal Society of Chemistry journal article supplement (doi:10.1039/c9ta11124g), 2019-12-11
Supplement: c9ta11124g1.pdf [file c9ta11124g1.pdf]

## **Supporting Information**

### **Engineered Self-Supported Electrocatalytic Cathode and Dendrite-Free Composite Anode Based on 3D Double-Carbon Hosts for Advanced Li-SeS<sub>2</sub> Batteries**

*MeiWang<sup>a</sup>, Yi Guo<sup>a</sup>, BoyaWang<sup>a</sup>, Hang Luo<sup>a</sup>, XuemeiZhang<sup>a</sup>, Qian Wang<sup>a</sup>, Yun Zhang<sup>a</sup>, Hao Wu<sup>a\*</sup>, HuakunLiu<sup>b</sup> and ShixueDou<sup>b</sup>*

*<sup>a</sup>Department of Advanced Energy Materials, College of Materials Science and Engineering, Sichuan University, Chengdu, 610064, P. R. China.*

*<sup>b</sup>Institute for Superconducting & Electronic Materials, Australian Institute of Innovative Materials, University of Wollongong, Wollongong, NSW 2500, Australia.*

## Section SI. Supporting Figures

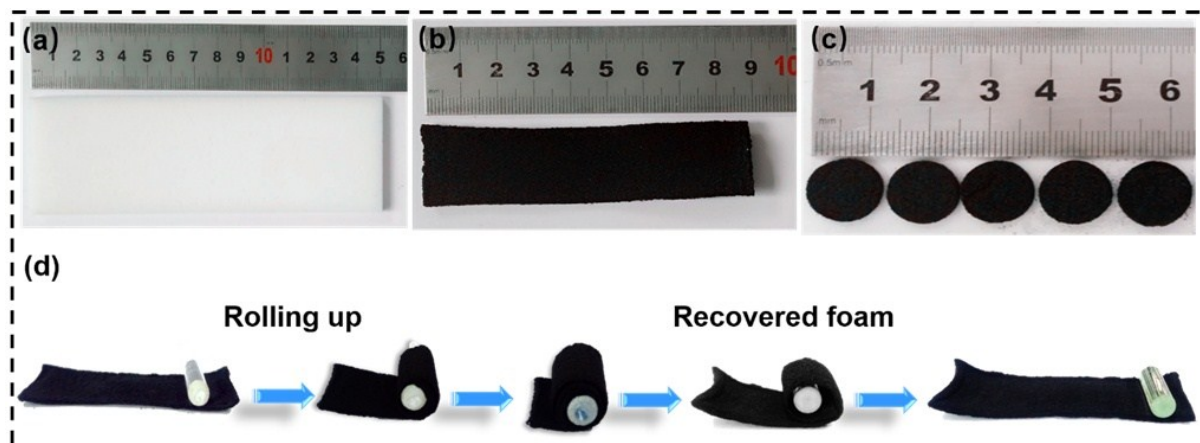

**Figure S1** (a-c) Digital images of commercial MF (a), as-prepared CF@CNTs (b) and CF@CNTs/CoS<sub>2</sub> hybrid (c). (d) Digital images of the rolling up process of the 3D flexible CF@CNTs/CoS<sub>2</sub>-SeS<sub>2</sub> electrode, which still maintains an integral morphology without any structural cracking.

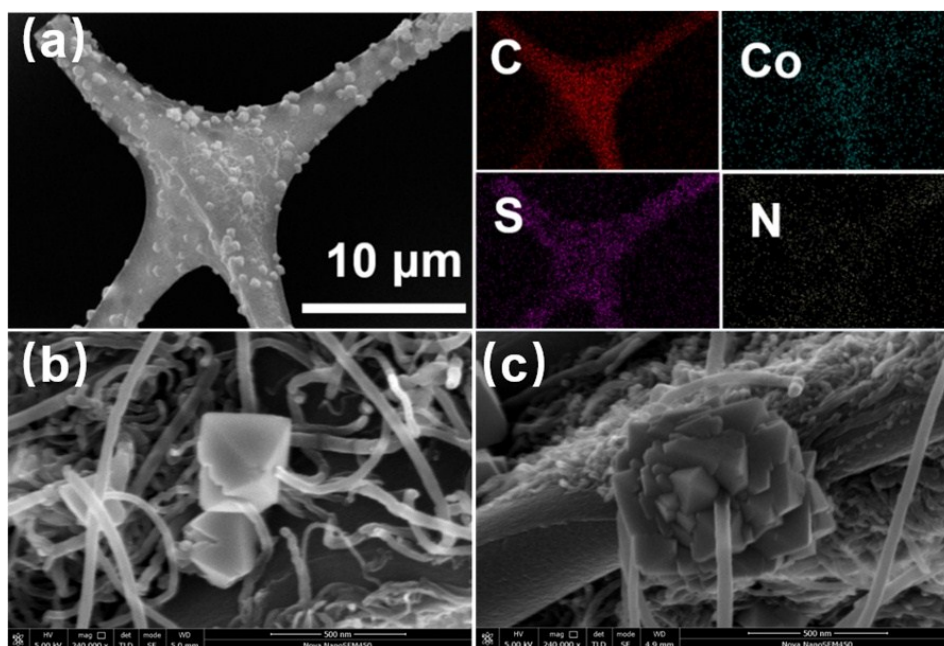

**Figure S2** (a) EDS mappings of C, Co, S, and N elements of CF@CNTs/CoS<sub>2</sub>. (b, c) FESEM images of CF@CNTs/CoS<sub>2</sub>.

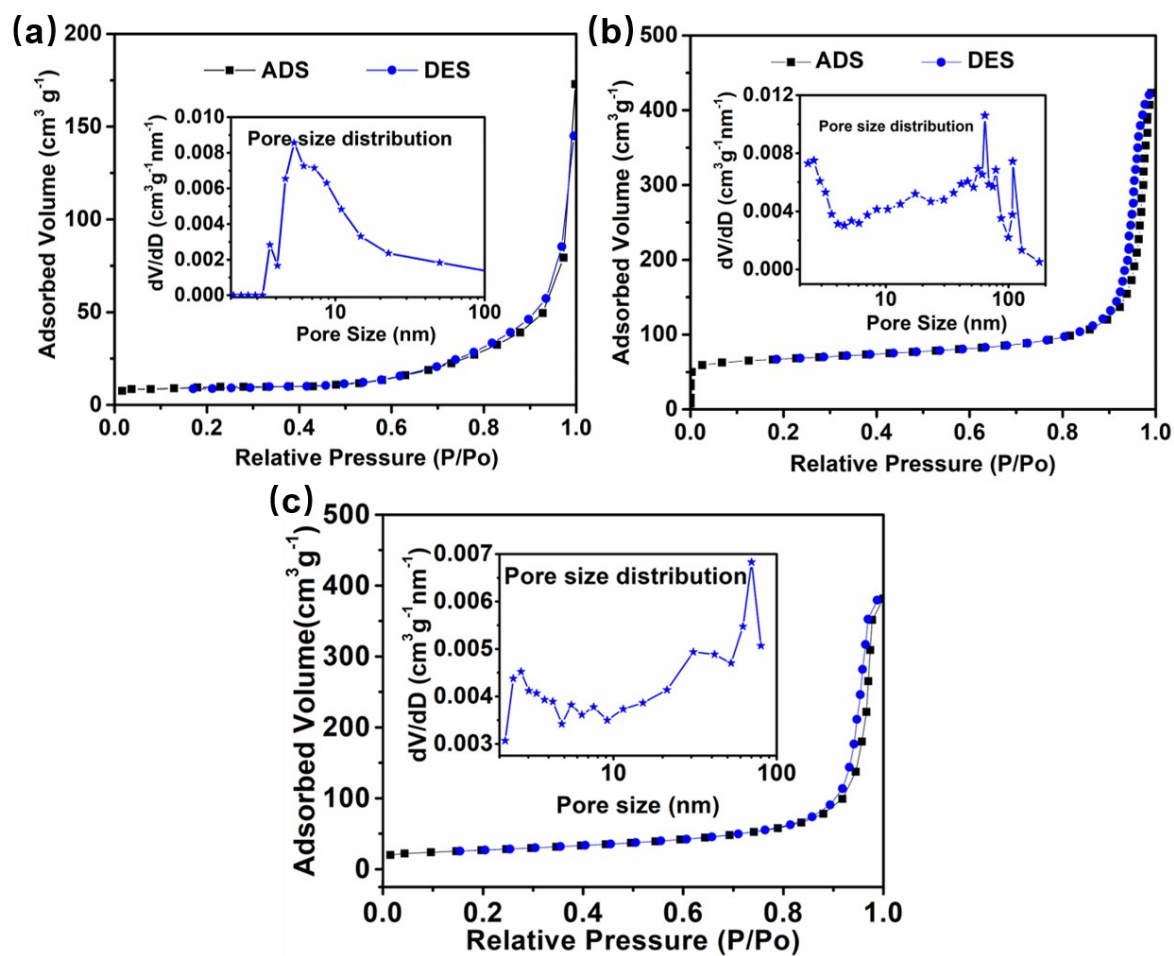

**Figure S3** Nitrogen adsorption/desorption isotherms and pore-size distributions (inset) of CF, CF@CNTs and CF@CNTs/CoS<sub>2</sub> with the BET and BJH methods.

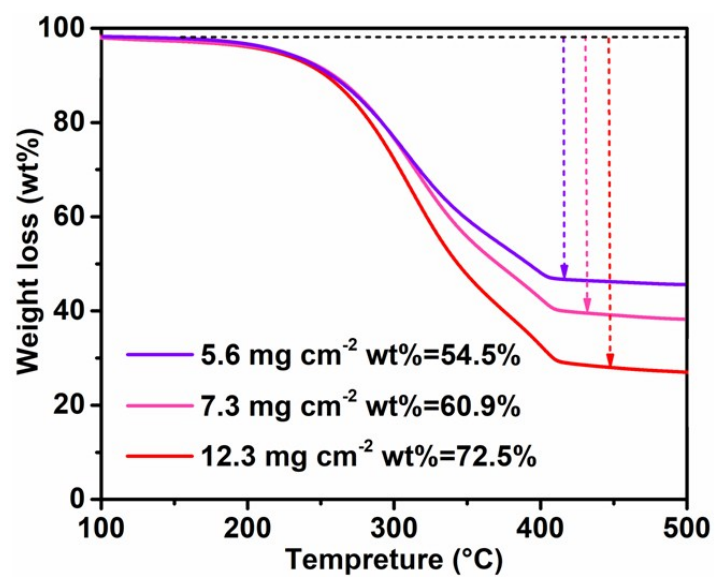

**Figure S4** TGA curves of CF@CNTs/CoS<sub>2</sub>@SeS<sub>2</sub> electrode materials with different areal SeS<sub>2</sub> loadings of 5.6, 7.3 and 12.3 mg cm<sup>-2</sup>, respectively.

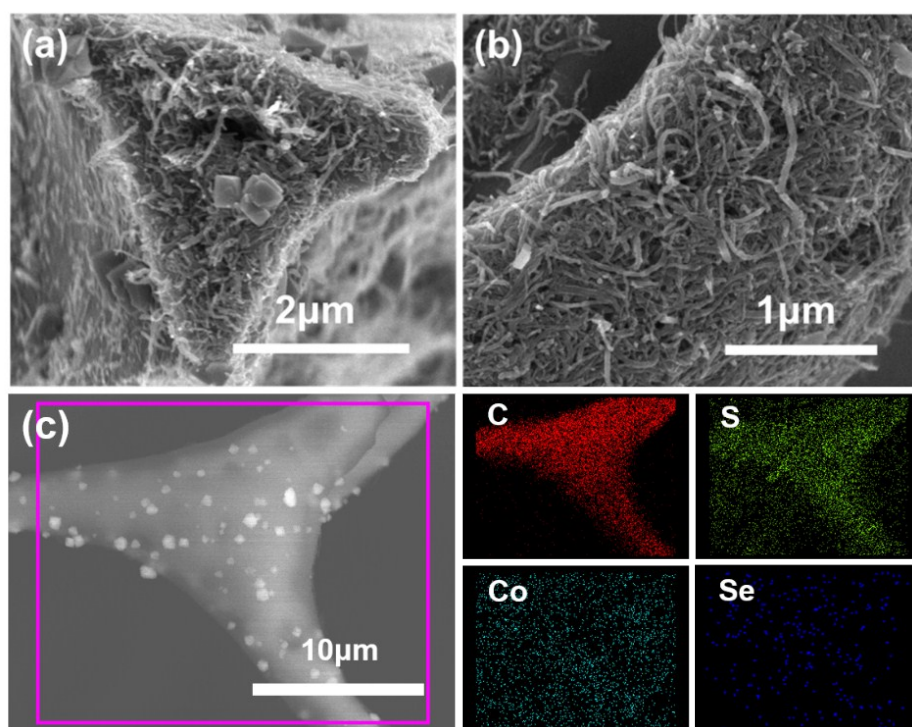

**Figure S5** (a, b) Typical FESEM images of CF@CNTs/CoS<sub>2</sub>@SeS<sub>2</sub> electrode with the areal SeS<sub>2</sub> loading of 5.6 mg cm<sup>-2</sup> and (c) EDS mappings of C, Co, S, and Se elements of CF@CNTs/CoS<sub>2</sub>@SeS<sub>2</sub>.

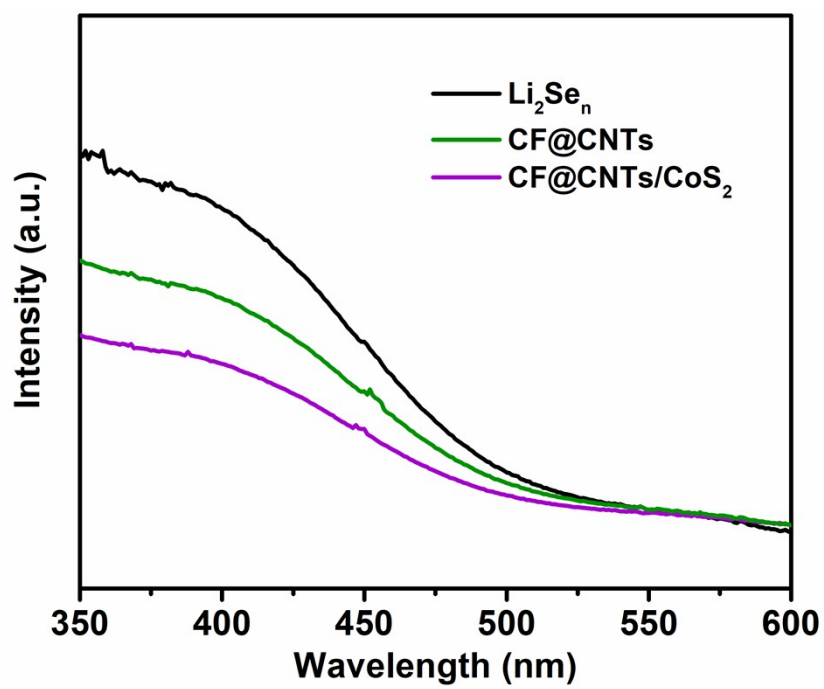

**Figure S6** UV-vis absorption spectra of  $\text{Li}_2\text{Se}_n$  ( $4 \leq n \leq 8$ ) solutions with exposure to  $\text{CF@CNTs/CoS}_2$  and  $\text{CF@CNTs}$

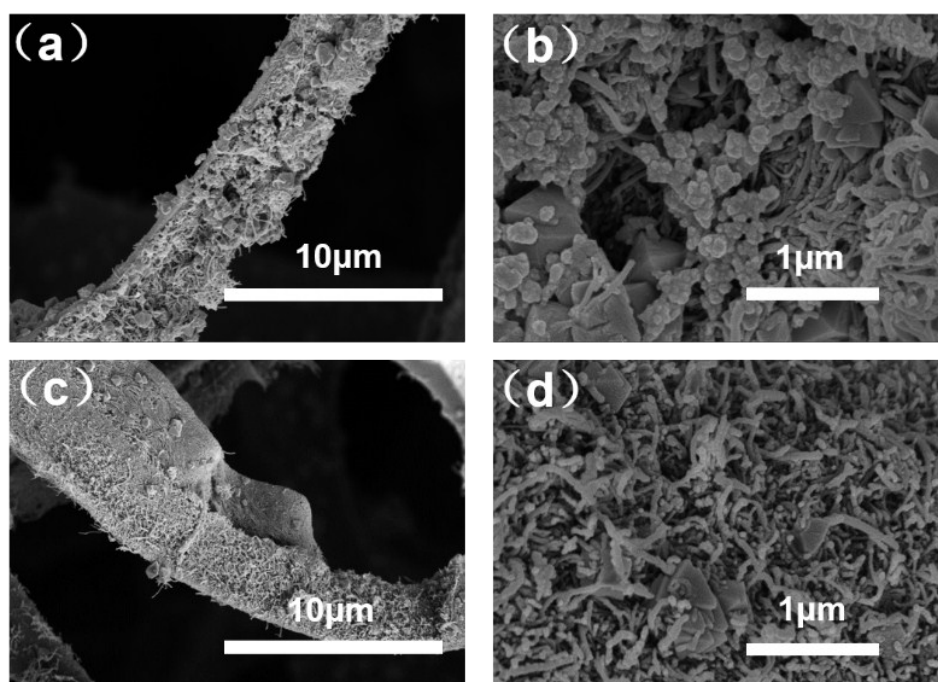

**Figure S7** FESEM images of CF@CNTs/CoS<sub>2</sub> after adsorption of Li<sub>2</sub>Se<sub>n</sub> (a-b) and Li<sub>2</sub>S<sub>n</sub> (c-d).

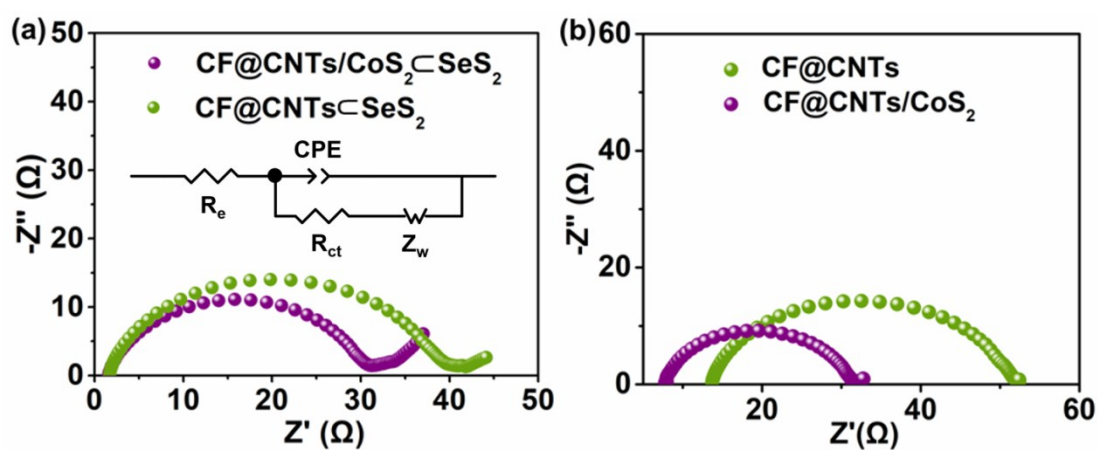

**Figure S8** (a) Nyquist plots of CF@CNTs/SeS<sub>2</sub> and CF@CNTs/CoS<sub>2</sub>/SeS<sub>2</sub> as cathode coupled with Li anode. (b) Nyquist plots of the symmetric cells with CF@CNTs or CF@CNTs/CoS<sub>2</sub> as both the working and counter electrodes.

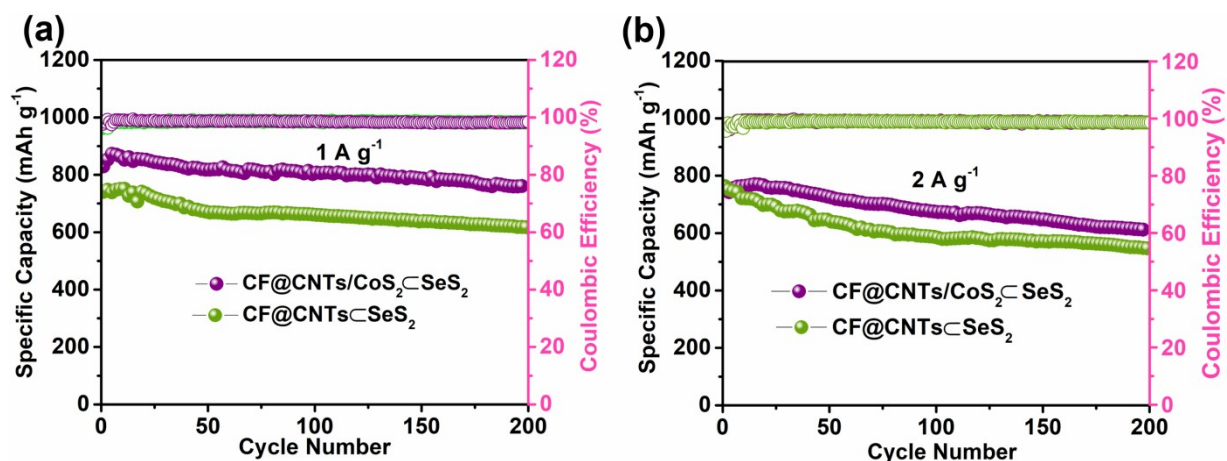

**Figure S9** Comparison of the cycling stabilities of CF@CNTs/CoS<sub>2</sub>/SeS<sub>2</sub> and CF@CNTs/SeS<sub>2</sub> electrodes at 1.0 A g<sup>-1</sup> for 200 cycles.

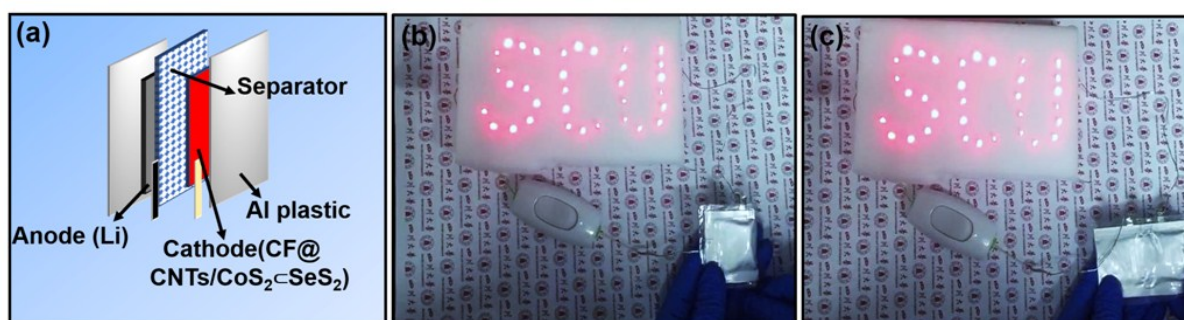

**Figure S10** (a) Schematic diagram of soft-packaged Li-SeS<sub>2</sub> battery; (b, c) Vivid photographs demonstration of the flexibility of the as-fabricated soft-packaged Li-SeS<sub>2</sub> battery based on the CF@CNTs/CoS<sub>2</sub>/SeS<sub>2</sub> cathode bending at 180° and after nearly 180°. The soft-packaged Li-SeS<sub>2</sub> battery can light up 33 red LEDs (nominal voltage of 2.0-2.2 V) in the flat and bent states.

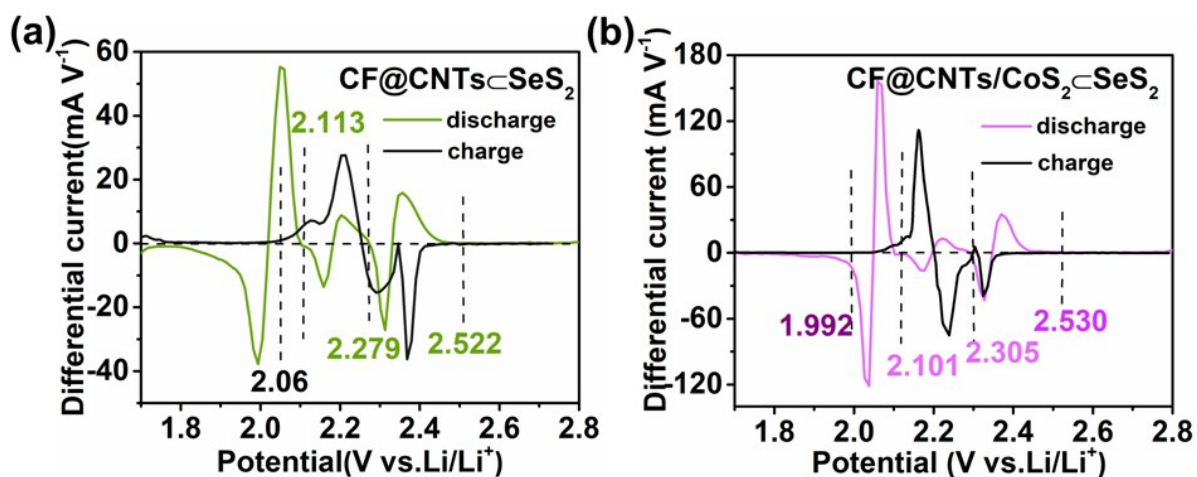

**Figure S11** Electrocatalytic effects of electrode materials verified from the CV profiles: differential CV curves of (a) CF@CNTs/SeS<sub>2</sub> and CF@CNTs/CoS<sub>2</sub>/SeS<sub>2</sub>; The baseline potentials and baseline current densities in (a, b) are defined as the values before the redox peaks, where the variation on current density is the smallest, namely  $dl/dV = 0$ .

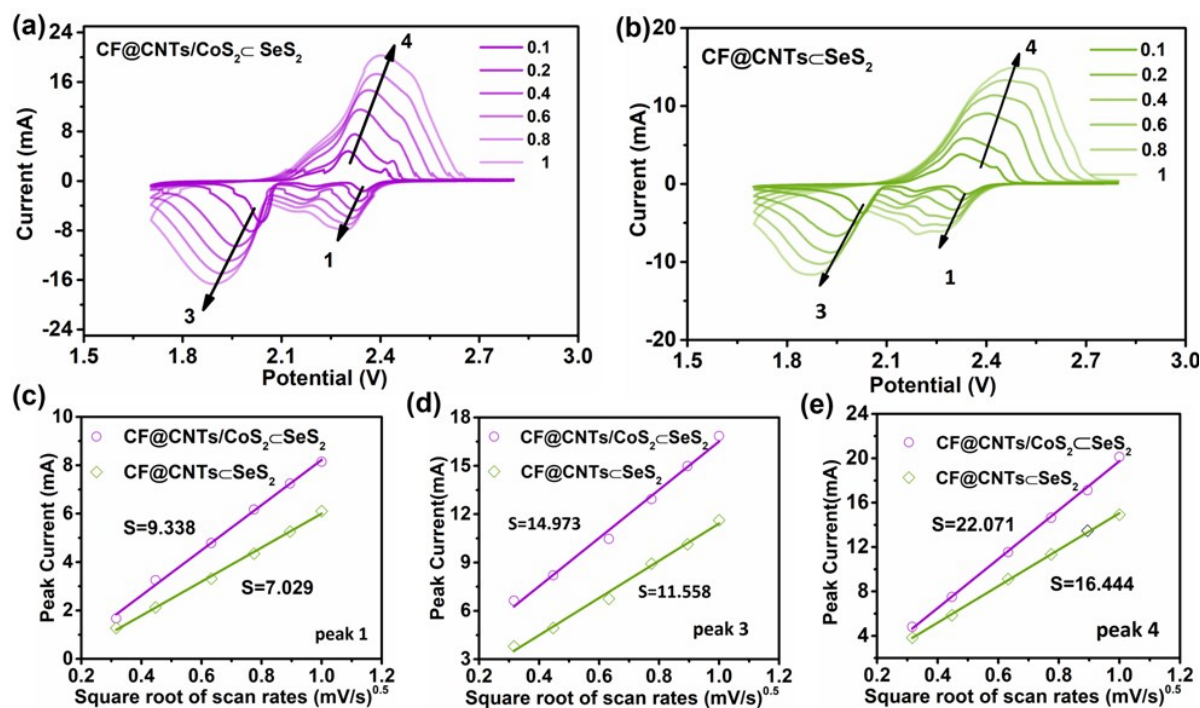

**Figure S12** CV curves of the (a) CF@CNTs/CoS<sub>2</sub>-SeS<sub>2</sub> and (b) CF@CNTs-SeS<sub>2</sub> electrodes at various scan rates. (c-d) Plots of the CV peak current intensities of (c) peak 1 (S<sub>8</sub>→Li<sub>2</sub>S<sub>4</sub>), (d) peak 3 (Li<sub>2</sub>S<sub>4</sub>→Li<sub>2</sub>S; Li<sub>2</sub>Se<sub>4</sub>→Li<sub>2</sub>Se), and (e) peak 4 (Li<sub>2</sub>S→Li<sub>2</sub>S<sub>8</sub>) versus the square root of scan rates.

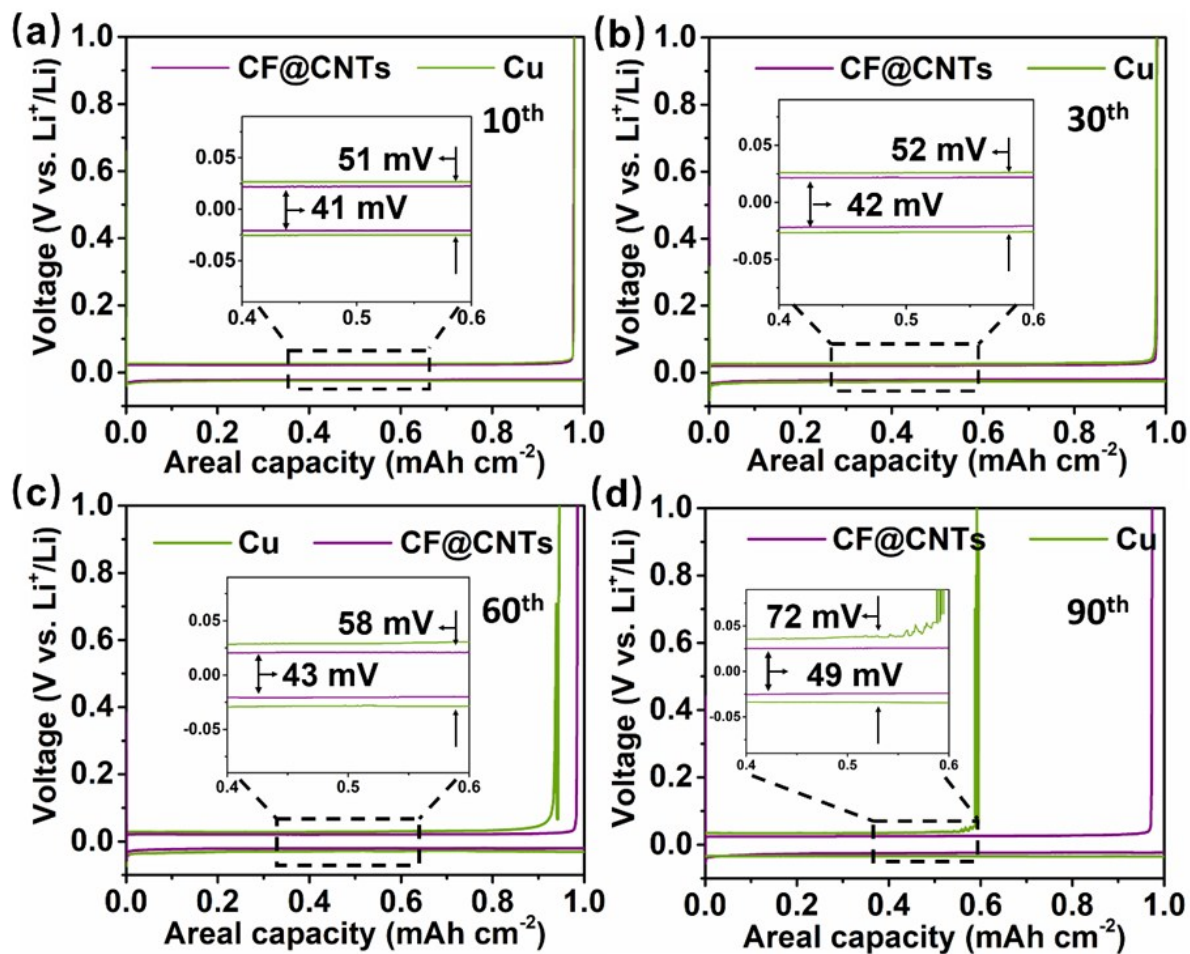

**Figure S13** The typical voltage profiles of Cu foil and CF@CNTs electrodes at a current density of  $1.0 \text{ mA cm}^{-2}$  with a cycling capacity of  $1.0 \text{ mAh cm}^{-2}$  after 10 (a), 30 (b), 60 (c), and 90 (d) cycles.

## Section SII. Supporting Tables

**Table S1** Elemental analysis results of MF and CF@CNTs.

| Samples | Element (wt.%) |       |       |
|---------|----------------|-------|-------|
|         | C              | N     | H     |
| MF      | 32.16          | 41.86 | 25.98 |
| CF@CNTs | 94.84          | 5.16  | ---   |

**Table S2** Square resistance of samples.

| Samples                         | CF    | CF@CNTs | CF@CNTs/CoS <sub>2</sub> |
|---------------------------------|-------|---------|--------------------------|
| Resistance ( $\Omega/\square$ ) | 24.88 | 0.65    | 0.38                     |

## Supplementary References

- [S1] J. Hu, H. Zhong, X. Yan and L. Zhang, *Applied Surface Science*. 2018, 457, 705-711.
- [S2] H. N. Fan, S. L. Chen, X. H. Chen, Q. L. Tang, A. P. Hu, W. B. Luo, H. K. Liu and S. X. Dou, *Advanced Functional Materials*. 2018, 28, 1805018.
- [S3] J. Zhang, Z. Li and X. W. D. Lou, *Angew Chem Int Ed Engl*. 2017, 56, 14295-14300.
- [S4] Z. Li, J. Zhang, B. Y. Guan and X. W. D. Lou, *Angew Chem Int Ed Engl*. 2017, 56, 16003-16007.
- [S5] F. Sun, H. Cheng, J. Chen, N. Zheng, Y. Li and J. Shi, *ACS Nano*. 2016, 10, 8289-8298.
- [S6] Z. Zhang, S. Jiang, Y. Lai, J. Li, J. Song and J. Li, *Journal of Power Sources*. 2015, 284, 95-102.
- [S7] Y. Wei, Y. Tao, Z. Kong, L. Liu, J. Wang, W. Qiao, L. Ling and D. Long, *Energy Storage Materials*. 2016, 5, 171-179.
- [S8] Z. Li, J. t. Zhang, H. B. Wu and X. W. D. Lou, *Advanced Energy Materials*. 2017, 7, 1700281.
- [S9] Y. Yang, X. J. Hong, C. L. Song, G. H. Li, Y. X. Zheng, D. D. Zhou, M. Zhang, Y. P. Cai and H. X. Wang, *Journal of Materials Chemistry A*. 2019, 7, 16323-16329.
